# Supplementary material
Source: publisher figshare collection journal article supplement (https://sage.figshare.com/ndownloader/files/16620980)
Supplement: Supplementary file 1 [file 16620980]

| Theme                                            | Author,<br>Year         | Level of<br>Evidence* | Objectives                                                                                                                                       | Participants<br>(sample size, age,<br>diagnosis)          | Results                                                                                                                                                                                                   |
|--------------------------------------------------|-------------------------|-----------------------|--------------------------------------------------------------------------------------------------------------------------------------------------|-----------------------------------------------------------|-----------------------------------------------------------------------------------------------------------------------------------------------------------------------------------------------------------|
| <b>Interactive,<br/>multimedia<br/>education</b> | Stewart et.<br>al, 2013 | Level 3               | To design and test an<br>accessible online support<br>intervention for children<br>with asthma and allergies                                     | n=27, ages 7-11<br>years, with<br>allergies and<br>asthma | <ul style="list-style-type: none"> <li>• Children reported feeling more comfortable talking about their asthma and allergies and seeking assistance</li> </ul>                                            |
|                                                  | Volk et. al,<br>2008    | Level 1               | To evaluate an<br>entertainment-based<br>decision aid for prostate<br>cancer screening among<br>individuals with low and<br>high health literacy | N=450, adult male<br>primary care<br>patients             | <ul style="list-style-type: none"> <li>• Improvements in the intervention group for self-advocacy among individuals with low literacy.</li> <li>• No differences for those with high literacy.</li> </ul> |

|                                     |                          |         |                                                                                                                                   |                                                                                                   |                                                                                                                                                                                                                |
|-------------------------------------|--------------------------|---------|-----------------------------------------------------------------------------------------------------------------------------------|---------------------------------------------------------------------------------------------------|----------------------------------------------------------------------------------------------------------------------------------------------------------------------------------------------------------------|
|                                     | Hoffman<br>et. al, 2017  | Level 1 | To determine the efficacy of an entertainment-based intervention to improve self-advocacy relating to colorectal cancer screening | n=59, 49-75 years<br>of age, African Americans                                                    | <ul style="list-style-type: none"> <li>Significant improvements in self-advocacy as measured by the Decisional Conflict Scale.</li> </ul>                                                                      |
| <b>Peer-led group interventions</b> | Bobroff &<br>Sax, 2010   | Level 4 | To examine the effectiveness of peer tutors teaching interview skills                                                             | n=6, 18-22 years,<br>students with disabilities<br>qualifying them for special education services | <ul style="list-style-type: none"> <li>Large gains from baseline to the checkout interviews were reported on the Interview Rating Form, however sample size was too small for statistical analyses.</li> </ul> |
|                                     | Brashers<br>et. al, 2017 | Level 1 | To assess the efficacy and durability of a peer-led intervention                                                                  | n= 98, 18+ years,<br>HIV+                                                                         | <ul style="list-style-type: none"> <li>No significant difference in self-advocacy skills on the Patient Self-Advocacy Scale.</li> </ul>                                                                        |

|                              |                                |         |                                                                                       |                                                                        |                                                                                                                                                                        |
|------------------------------|--------------------------------|---------|---------------------------------------------------------------------------------------|------------------------------------------------------------------------|------------------------------------------------------------------------------------------------------------------------------------------------------------------------|
|                              | Jonikas et. al, 2013           | Level 1 | To investigate the impact of a peer-led self-advocacy intervention                    | n=519, mean age = 45.8 years, mental health conditions                 | <ul style="list-style-type: none"> <li>• Significant improvements in Patient Self Advocacy Scale in the intervention group.</li> </ul>                                 |
|                              | Pickett et. al, 2010           | Level 3 | To measure the effects of the BRIDGES program in promoting self-advocacy              | n=160, mean age = 42.6 years, mental health conditions                 | <ul style="list-style-type: none"> <li>• Participants reported increased self-advocacy and empowerment.</li> </ul>                                                     |
|                              | Pickett et. al, 2012           | Level 1 | To measure the effects of the BRIDGES program in promoting self-advocacy              | n=428 adults with mental health conditions                             | <ul style="list-style-type: none"> <li>• Improvements were noted in overall empowerment and self-advocacy in interviews that was maintained after 6-months.</li> </ul> |
| <b>Writing interventions</b> | Cuenca-Carlino & Mustian, 2013 | Level 4 | To determine to what extent self-regulated strategy development (SRSD) improves self- | n=9, middle school aged, students receiving special education services | <ul style="list-style-type: none"> <li>• Improvement in self-determination scores from pre-test (mean 4.37, SD=2.13) to post-test (mean 9.33, SD=1.00).</li> </ul>     |

|  |                      |         |                                                                                                                                               |                                                 |                                                                                                                                                                                                                                                                                                                                                                                                        |
|--|----------------------|---------|-----------------------------------------------------------------------------------------------------------------------------------------------|-------------------------------------------------|--------------------------------------------------------------------------------------------------------------------------------------------------------------------------------------------------------------------------------------------------------------------------------------------------------------------------------------------------------------------------------------------------------|
|  |                      |         | determination knowledge and skills                                                                                                            |                                                 |                                                                                                                                                                                                                                                                                                                                                                                                        |
|  | DeMarco & Chan, 2013 | Level 1 | To investigate the feasibility of, and adherence, stigma, and self-advocacy related outcomes following a 4-week peer-led writing intervention | n=110, 40 years or older, black women with HIV+ | <ul style="list-style-type: none"> <li>• Significant between group differences found in adherence measures: condom use and safe sex; also reported significant increase in condom use from baseline to 6-weeks post-intervention for the intervention group.</li> <li>• Significant time effect for Silencing the Self Scale between baseline and 6-week follow up for intervention groups.</li> </ul> |

|                                             |                       |         |                                                                                                                                            |                                   |                                                                                                                                                                                                    |
|---------------------------------------------|-----------------------|---------|--------------------------------------------------------------------------------------------------------------------------------------------|-----------------------------------|----------------------------------------------------------------------------------------------------------------------------------------------------------------------------------------------------|
|                                             |                       |         |                                                                                                                                            |                                   | <ul style="list-style-type: none"> <li>No significant changes in stigma measure.</li> </ul>                                                                                                        |
| <b>Workplace modifications and advocacy</b> | Allaire et. al, 2011  | Level 3 | To evaluate how positive research findings about a job retention intervention for people with chronic illness could be applied to practice | n=57, adults with chronic illness | <ul style="list-style-type: none"> <li>Individuals reported increased confidence in talking to an employer and a colleague about their illness.</li> </ul>                                         |
| <b>Disease specific programs</b>            | Bogart et. al, 2012   | Level 2 | To compare effects of treatment advocacy (TA) program on self-advocacy beliefs                                                             | n= 121, 18 years or older, HIV+   | <ul style="list-style-type: none"> <li>TA was not significantly associated with self-advocacy [b (SE) = -0.1 (0.1), p = .35], or adherence self-efficacy [b (SE) = 0.5 (0.4), p = .22].</li> </ul> |
|                                             | Mutchler et. al, 2011 | Level 4 | To identify the impact of a TA program on <b>client</b> engagement, initiation of                                                          | n=25, mean age=49 years, HIV+     | <ul style="list-style-type: none"> <li><b>Individuals</b> felt empowered to ask questions, to change</li> </ul>                                                                                    |

|  |                     |         |                                                                                                                       |                                              |                                                                                                                                                                                                        |
|--|---------------------|---------|-----------------------------------------------------------------------------------------------------------------------|----------------------------------------------|--------------------------------------------------------------------------------------------------------------------------------------------------------------------------------------------------------|
|  |                     |         | treatment, and treatment adherence                                                                                    |                                              | <p>regiments or to change providers</p> <ul style="list-style-type: none"> <li>TA's encouragement of becoming an active consumer helped to prepare them for appointments.</li> </ul>                   |
|  | Hawley et. al, 2017 | Level 1 | To investigate the feasibility and effects of a self-efficacy intervention for individuals with acquired brain injury | n=11, 21-58 years with acquired brain injury | <ul style="list-style-type: none"> <li>No significant differences between groups at post testing, however gains were noted on the Self Advocacy Scale and Personal Advocacy Activity Scale.</li> </ul> |

\*Levels of evidence were assigned using the AOTA EBP Project CAP Guidelines, which were adapted from Sackett, D.L., Rosenberg, W.M., Muir Gray, J.A., Haynes, R.B. & Richardson, W.S. (1996). Evidence-based medicine: What it is and what it isn't. *British Medical Journal*, 312, 71-72).
